# Supplementary material for: Phase I study of vorinostat with gefitinib in BIM deletion polymorphism/epidermal growth factor receptor mutation double‐positive lung cancer
Source: PubMed Central journal article supplement — Cancer Sci. 2020 Jan 6;111(2):561–70. doi: 10.1111/cas.14260 (PMC7004511; doi:10.1111/cas.14260), 2020-01-06
Supplement: CAS-111-561-s001.pdf [file CAS-111-561-s001.pdf]

Supplementary table 2. Previous EGFR-TKI therapy

| Level | Case  | EGFR-TKIs |             |           |
|-------|-------|-----------|-------------|-----------|
| 1     | VN-01 | Gefitinib |             |           |
|       | VN-02 | Erlotinib |             |           |
|       | VN-03 | Gefitinib |             |           |
| 2     | VS-01 | Erlotinib | Gefitinib   | Erlotinib |
|       | VI-01 | Erlotinib |             |           |
|       | VN-04 | Gefitinib |             |           |
| 3     | VK-01 | Erlotinib | Gefitinib   | Afatinib  |
|       | VK-02 | Gefitinib | Erlotinib   |           |
|       | VI-03 | Erlotinib | Afatinib    |           |
|       | VS-02 | Gefitinib | Erlotinib   |           |
|       | VN-05 | Gefitinib | Osimertinib |           |
|       | VN-06 | Gefitinib | Erlotinib   |           |

Supplementary table 3. Summary of pharmacokinetic and pharmacodynamic analysis

| Level | Case  | EGFR   | BIM     | BSA<br>(m <sup>2</sup> ) | Acetylated<br>histone H3 | BIM <sub>EL</sub> | Exon 3/4<br>changing<br>rate (%) | Vorinostat                   |                                    | Gefitinib                   |                                  |
|-------|-------|--------|---------|--------------------------|--------------------------|-------------------|----------------------------------|------------------------------|------------------------------------|-----------------------------|----------------------------------|
|       |       |        |         |                          |                          |                   |                                  | C <sub>max</sub><br>(nmol/L) | AUC <sub>inf</sub><br>(nmol · h/L) | C <sub>max</sub><br>(ng/mL) | AUC <sub>inf</sub><br>(ng · h/L) |
| 1     | VN-01 | Del 19 | WT/Del  | 1.55                     | ↑                        | ↑                 | 49.7±2.1                         | 430                          | 1500                               | 295                         | 5340                             |
|       | VN-02 | L858R  | WT/Del  | 1.28                     | ↑                        | →                 | 30.9±3.0                         | 762                          | 2830                               | 360                         | 9320                             |
|       | VN-03 | Del 19 | WT/Del  | 1.63                     | ↑                        | →                 | 26.7±1.4                         | 615                          | 2960                               | 378                         | 11400                            |
| 2     | VS-01 | Del 19 | WT/Del  | 1.58                     | ↑                        | ↑                 | 52.3±2.4                         | 643                          | 2240                               | 349                         | 8270                             |
|       | VI-01 | L858R  | WT/Del  | 1.79                     | ↑                        | ↑                 | 28.6±4.7                         | 641                          | 2260                               | 159                         | 5250                             |
|       | VN-04 | Del 19 | WT/Del  | 1.7                      | ↑                        | ↑                 | 50.7±2.9                         | 699                          | 2950                               | 211                         | 8480                             |
| 3     | VK-01 | Del 19 | WT/Del  | 1.54                     | ↑                        | →                 | 49.3±2.5                         | 1630                         | 8650                               | 802                         | 23400                            |
|       | VK-02 | Del 19 | WT/Del  | 1.72                     | ↑                        | →                 | NE                               | 1040                         | 5270                               | 161                         | NE                               |
|       | VI-03 | Del 19 | Del/Del | 2.27                     | →                        | →                 | 66.5±2.1                         | 789                          | 4050                               | 234                         | 7560                             |
|       | VS-02 | Del 19 | WT/Del  | 1.85                     | NE                       | NE                | 54.4±0.7                         | 847                          | 3420                               | 159                         | 8790                             |
|       | VN-05 | L858R  | WT/Del  | 1.41                     | ↑                        | ↑                 | 47.6±3.6                         | 1040                         | 4490                               | 266                         | 4730                             |
|       | VN-06 | L858R  | WT/Del  | 1.94                     | ↑                        | →                 | 48±3.5                           | 695                          | 3010                               | 148                         | 3190                             |

BSA : body surface area, Del 19: exon 19 deletion, WT: wild type, Del: deletion, NE : not evaluated, ↑ : increased, → : not discernibly changed.

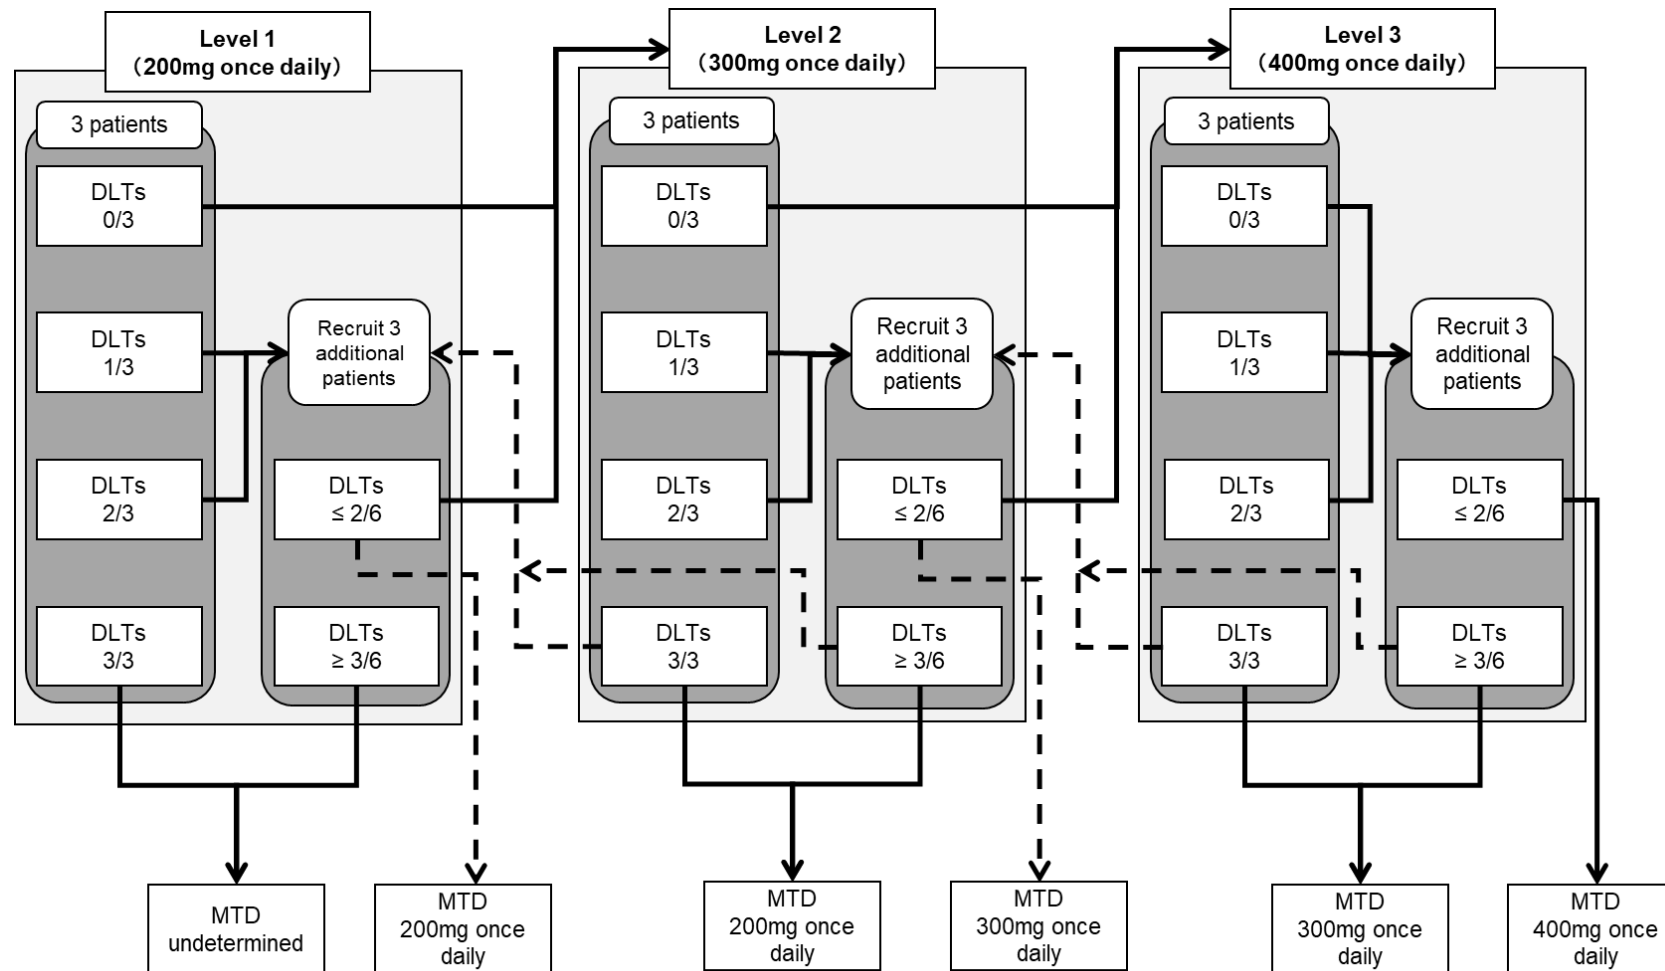

**Supplementary figure 1.** Study design. Dashed arrows; if no DLTs are observed in all of 3 patients at a lower dose level, an additional 3 patients are recruited. DLTs, dose-limiting toxicities. MTD, maximum tolerated dose. This figure was from the reference 22.

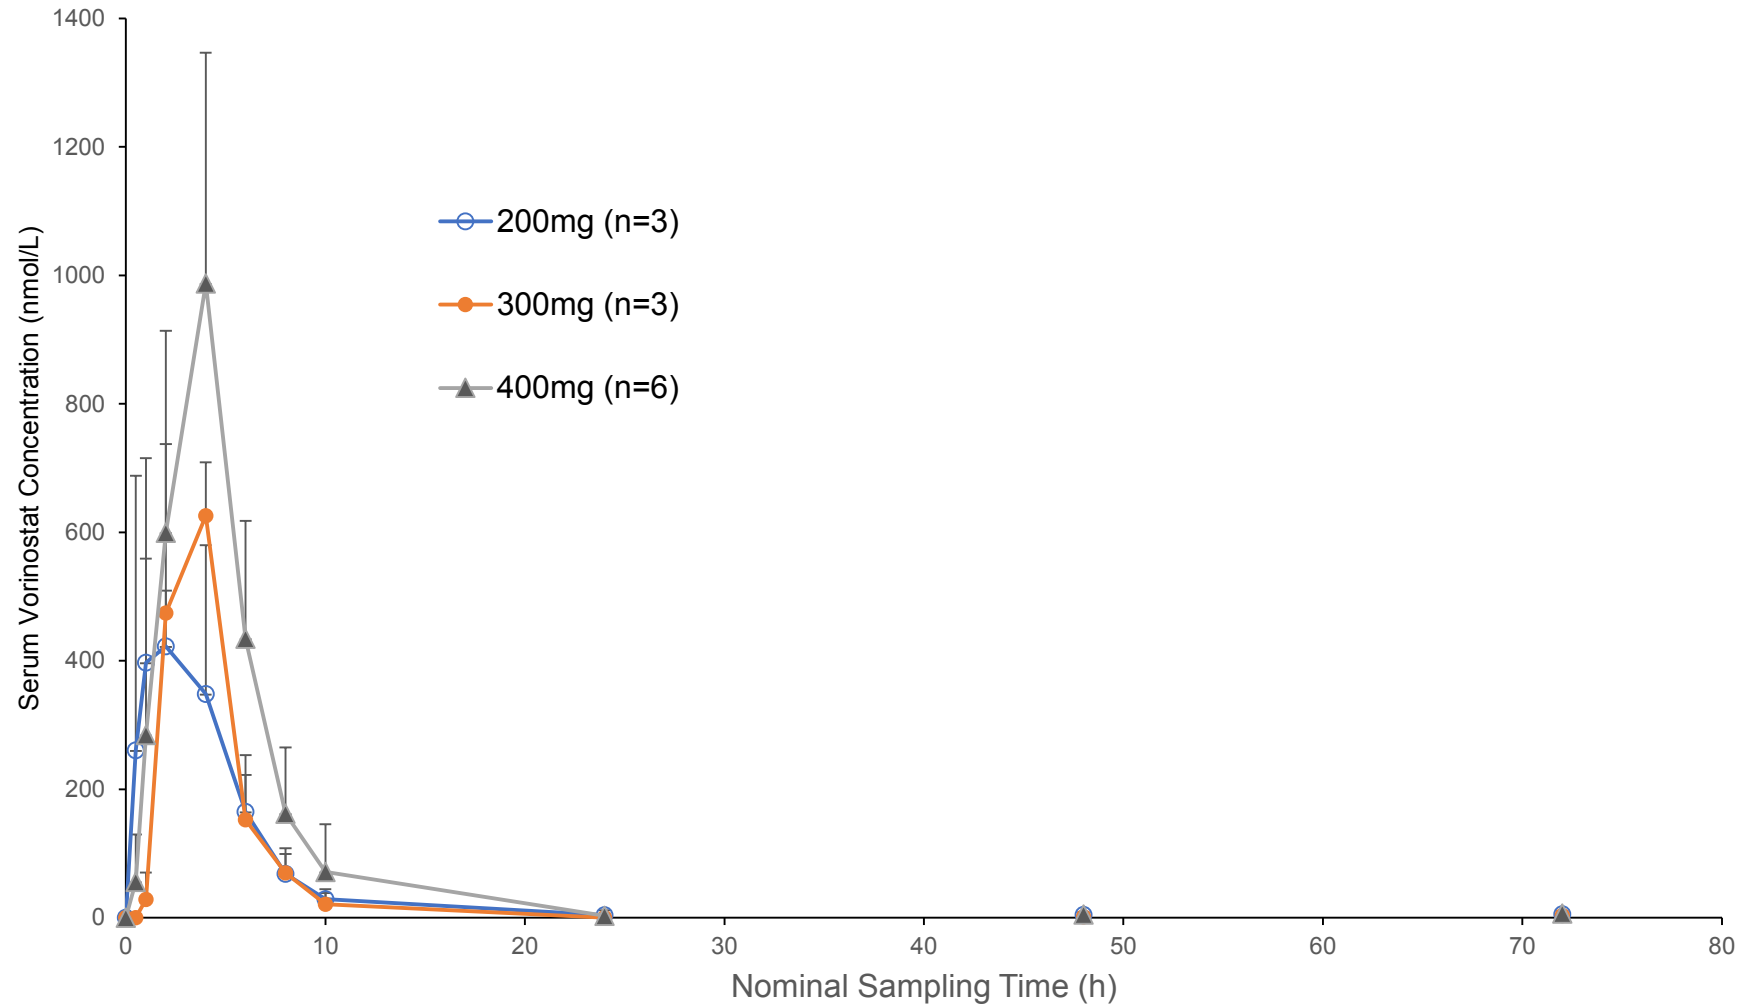

**Supplementary figure 2. Kinetics of vorinostat concentration.**

Mean (+SD) serum vorinostat concentration by each dose level.

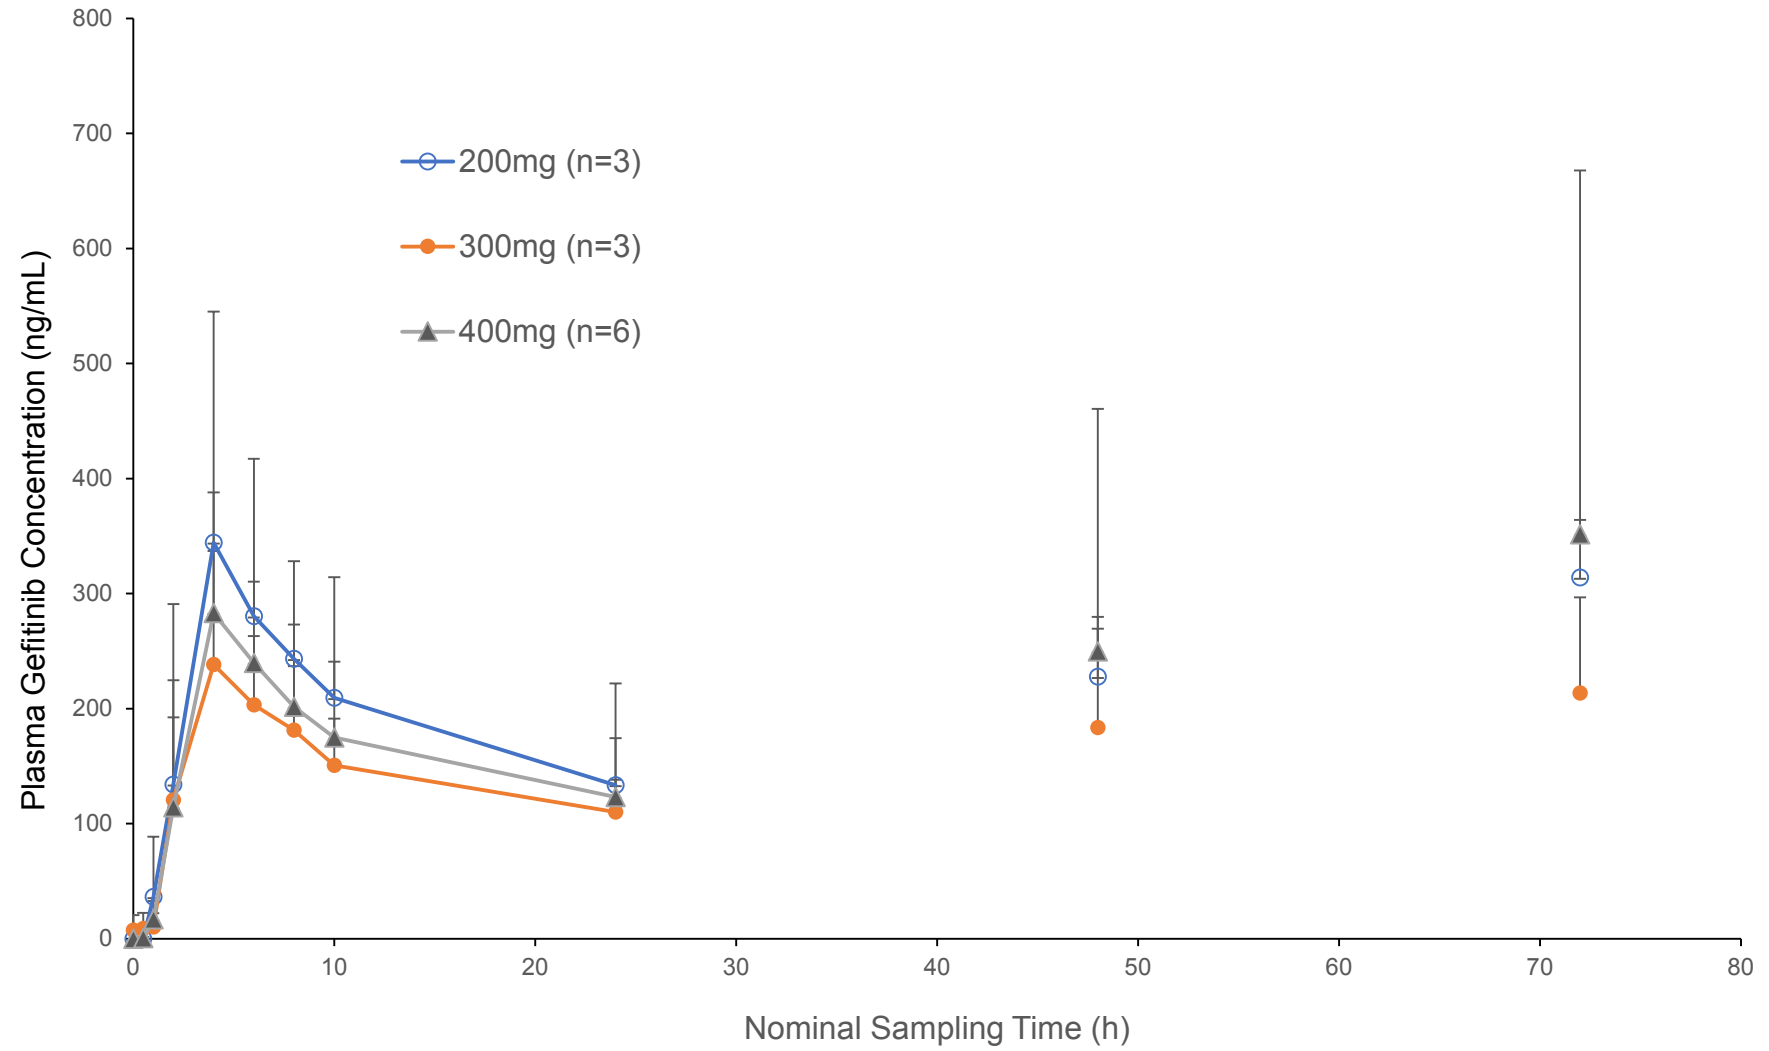

**Supplementary figure 3. Time kinetics of gefitinib concentration.**  
Mean (+SD) plasma gefitinib concentration by each dose level.
